# Supplementary material for: Discovery of an Insect Neuroactive Helix Ring Peptide from Ant Venom
Source: MDPI journal article supplement (doi:10.3390/toxins15100600), 2023-10-05
Supplement: s1 [file s1]

## SUPPLEMENTARY INFORMATION

### Discovery of an Insect-Neuroactive Helix Ring Peptide from Ant Venom

This PDF file includes:

|           |                                                                           |        |
|-----------|---------------------------------------------------------------------------|--------|
| Figure S1 | Impact of injection of U <sub>11</sub> on aphid fitness                   | Page 2 |
| Figure S2 | U <sub>11</sub> insecticidal activities by ingestion                      | Page 3 |
| Figure S3 | Impact of injection of U <sub>11</sub> on aphid and weevil                | Page 3 |
| Figure S4 | TOCSY and NOESY spectra of U <sub>11</sub>                                | Page 4 |
| Figure S5 | Natural abundance <sup>15</sup> N-SOFAST HMQC spectrum of U <sub>11</sub> | Page 5 |
| Figure S6 | Natural abundance <sup>13</sup> C HSQC spectrum of U <sub>11</sub>        | Page 6 |
| Figure S7 | Amino acid sequence alignment of U <sub>11</sub> peptides                 | Page 7 |
| Table S1  | Experimental restraints and structural statistics of U <sub>11</sub>      | Page 8 |

A.

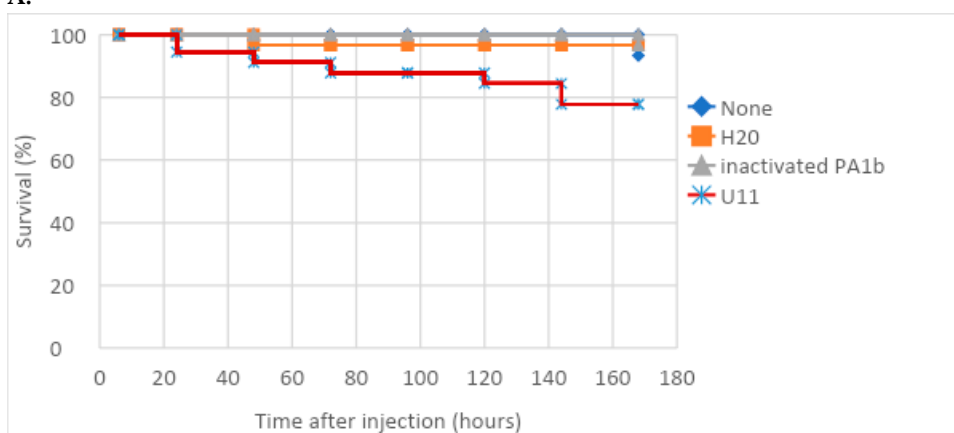

B.

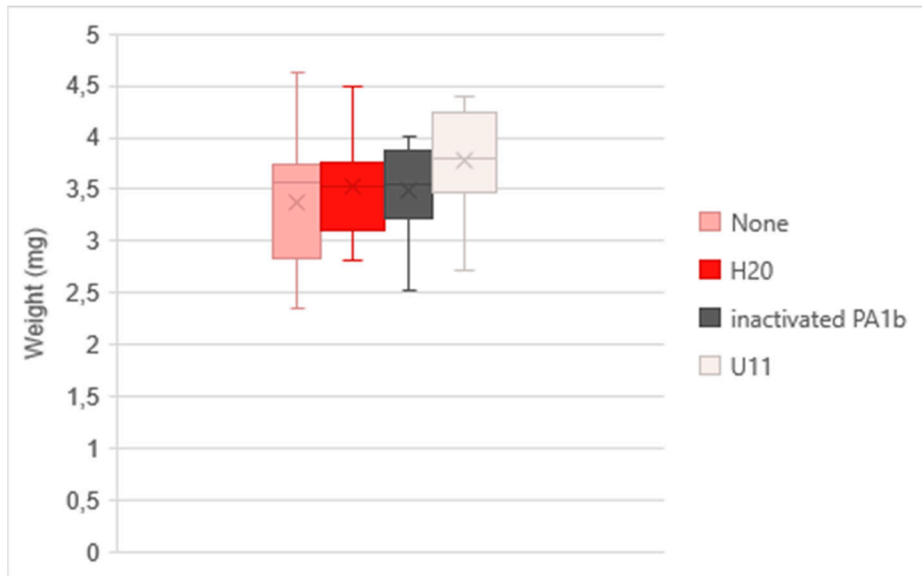

**Figure S1.** Impact of injection of U<sub>11</sub> on aphid fitness. (A) Survival curves. The different lines represent the survival curves for the different groups of aphids: (i) non-injected aphids, (ii) aphids injected with sterilized water, (iii) aphids injected with the negative control (PA1b inactivated peptide) and (iv) aphids injected with the U<sub>11</sub> (n = 30 aphids per condition). Aphids were monitored daily. Survival data were analyzed with the R survival and survminer packages and curves were compared using the log rank test. (B) **Aphids' weight 7 days after injection.** Results are displayed as box plots where central lines represent the medians, boxes comprise the 25–75 percentiles and whiskers denote the range; (n = 10 aphids per condition). Because the final aphid mass data did not meet the conditions for normality and homoscedasticity (Shapiro wilk and bartlett test), they were analyzed using the global nonparametric Kruskal-Wallis test, followed by a Wilcoxon multiple comparisons test with a Bonferroni correction.

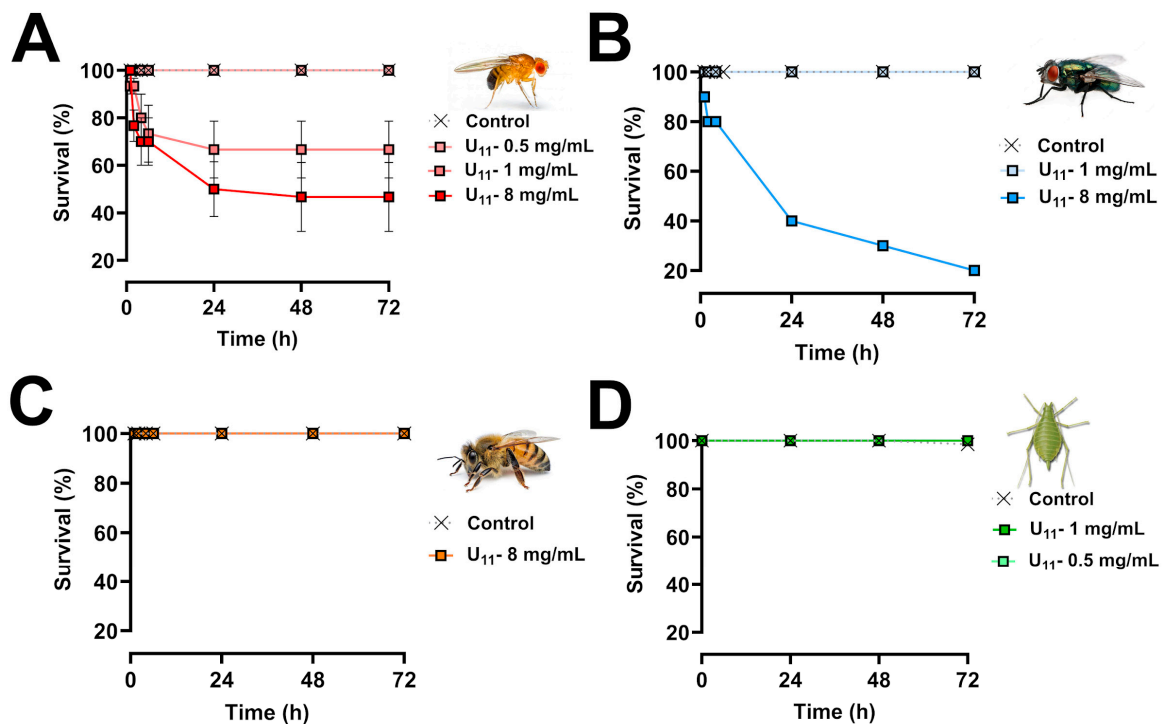

**Figure S2.** U<sub>11</sub> insecticidal activities by ingestion. Survival rates of *D. melanogaster* (A), *L. caesar* (B), *A. mellifera* (C) and *A. pisum* (D), monitored for three days after U<sub>11</sub> ingestion.

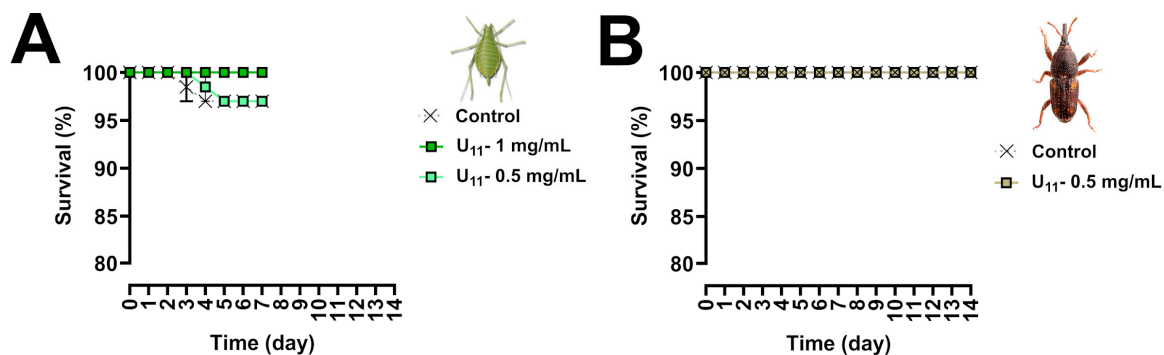

**Figure S3.** Impact of ingestion of U<sub>11</sub> on aphids and weevils. Survival rate of aphids (*A. pisum*) and weevils (*S. orizae*) fed for seven and 14 days, respectively, with artificial diet completed with the peptide U<sub>11</sub>.

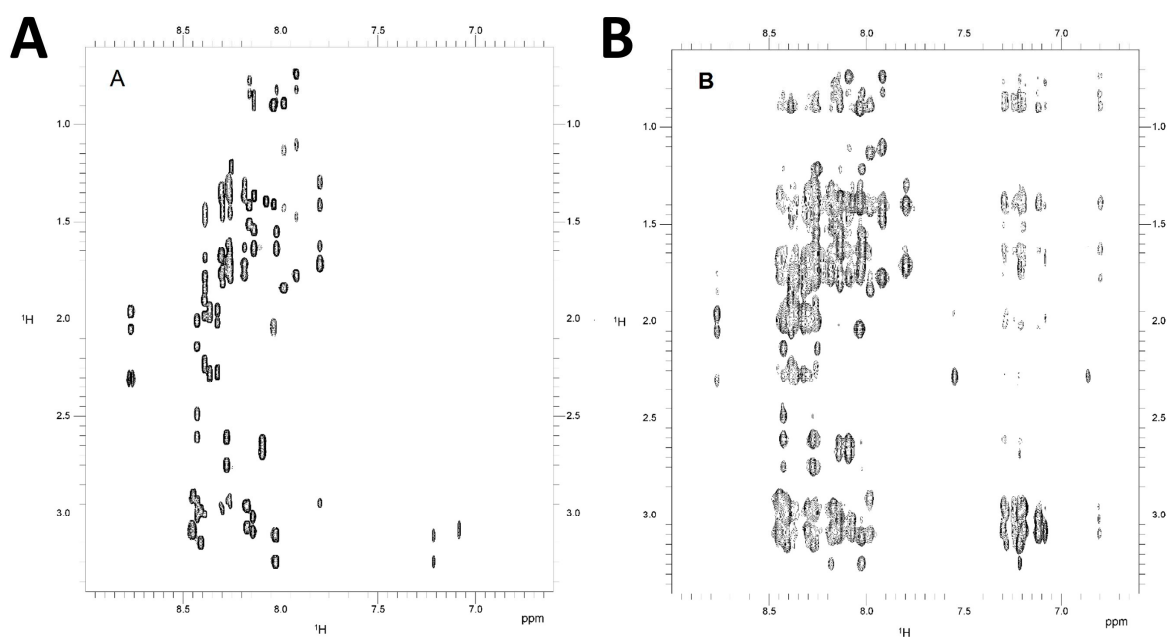

**Figure S4.** HN/aliphatic regions of the 2D <sup>1</sup>H-NMR spectra of U<sub>11</sub>. A) TOCSY spectrum and B) 100-ms mixing time NOESY spectrum of U<sub>11</sub> in 90% H<sub>2</sub>O/10% D<sub>2</sub>O at 298 K, pH 5.1.

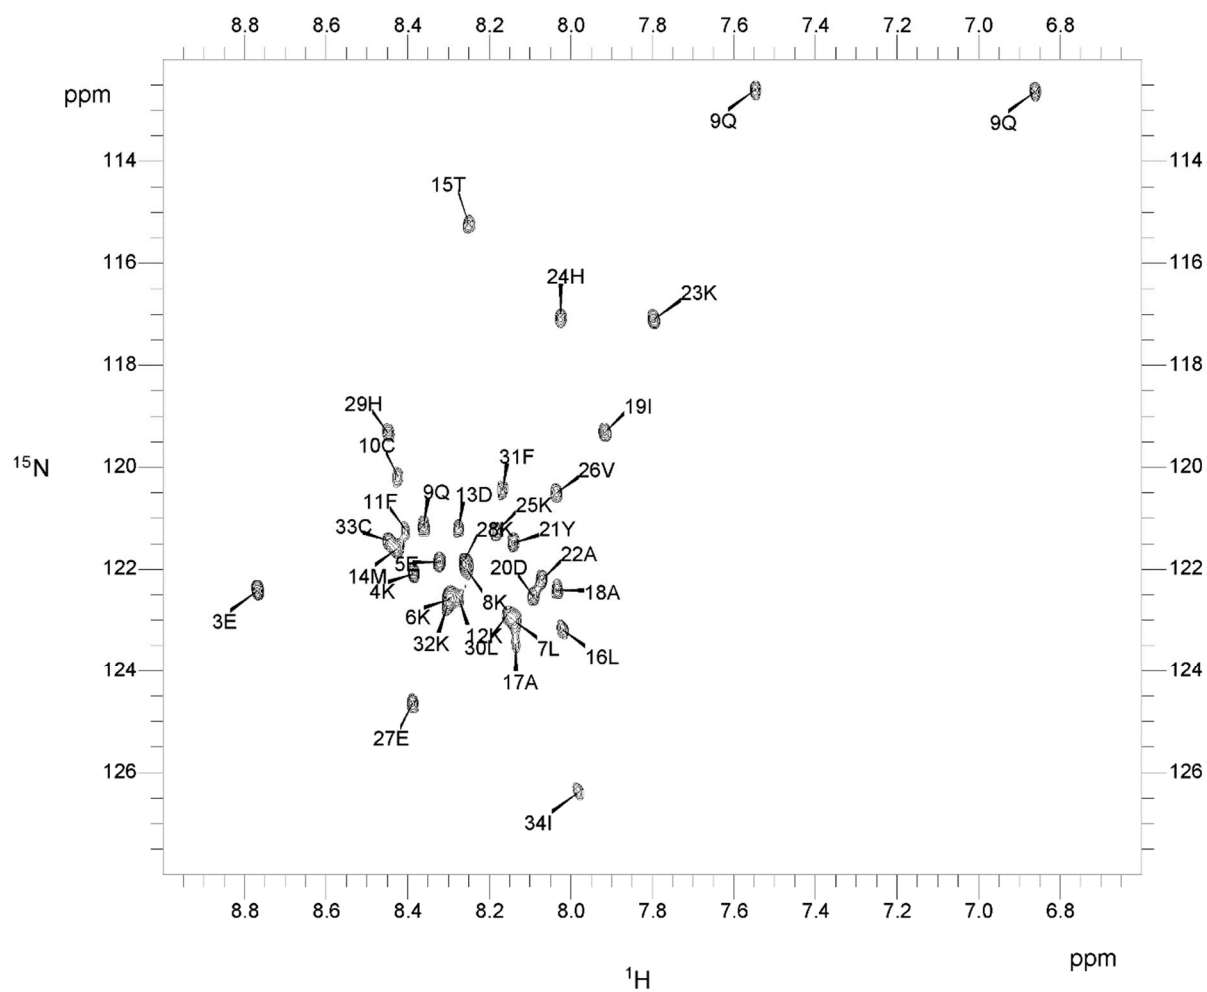

**Figure S5.** Natural abundance  $^{15}\text{N}$ -SOFAST HMQC spectrum of U<sub>11</sub> in 90% H<sub>2</sub>O/10% D<sub>2</sub>O at 298 K, pH 5.1. The assignment of residues to cross-peaks is indicated in one-letter code (The same region of the  $^1\text{H}$  spectra is shown in the F2 dimension as in Figure S4).



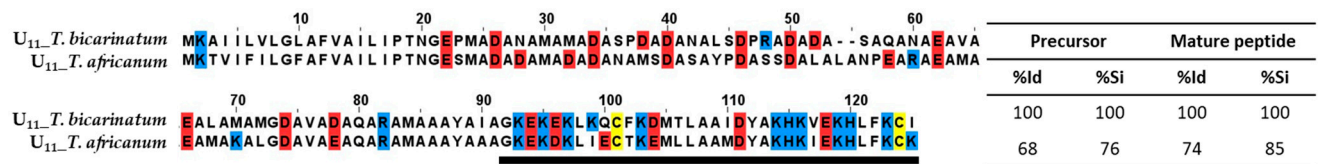

**Figure S7. Amino acid sequence alignment of U<sub>11</sub> peptides.** Clustalw alignment of the U<sub>11</sub> precursor sequences from *Tetramorium* ant venoms. Mature peptides are underlined, lysine/arginine residues are boxed in blue, glutamate/aspartate residues are boxed in red, and cysteine residues are boxed in yellow. %Id and %Si indicate the percentage of sequence identity and sequence similarity, respectively, for the whole precursor sequence and the mature region.

**Table S1. Experimental restraints and structural statistics of U<sub>11</sub>.** <sup>a</sup>: values are given as mean  $\pm$  standard deviation (n = 15). <sup>b</sup> calculated using MOLMOL.

| NMR restraints                                                   |                                      |                 |
|------------------------------------------------------------------|--------------------------------------|-----------------|
| <i>Distance restraints</i>                                       |                                      |                 |
| Total NOE                                                        | 738                                  |                 |
| Unambiguous                                                      | 509                                  |                 |
| Ambiguous                                                        | 229                                  |                 |
| Hydrogen bonds                                                   | 14                                   |                 |
| <i>Dihedral Angle Restraints</i>                                 | 48                                   |                 |
| <i>Covalent disulfide bond</i>                                   | Cys <sup>10</sup> -Cys <sup>33</sup> |                 |
| Structural Statistics for the final 15 models of U <sub>11</sub> |                                      |                 |
| <i>Average number of violations per structure</i>                |                                      |                 |
| NOEs ≥ 0.3 Å                                                     | 0                                    |                 |
| Hydrogen bonds ≥ 0.3 Å                                           | 0                                    |                 |
| Dihedrals ≥ 10°; ≥ 5°                                            | 0; 2.1                               |                 |
| <i>Average RMSD (pairwise, Å)<sup>a, b</sup></i>                 | bb (N-C <sub>α</sub> --C')           | All heavy atoms |
| Whole (2-33)                                                     | 0.35 ± 0.08                          | 0.75 ± 0.14     |
| Ring 10-33                                                       | 0.27 ± 0.09                          | 0.60 ± 0.14     |
| Secondary structure elements<br>(7-9; 17-24; 27-30)              | 0.20 ± 0.05                          | 0.52 ± 0.11     |
| <i>Ramachandran Analysis</i>                                     |                                      |                 |
| Most favored region and allowed region                           | 89                                   |                 |
| Generously allowed                                               | 10.6%                                |                 |
| Disallowed                                                       | 0.4%                                 |                 |
| <i>Energies (kcal.mol<sup>-1</sup>)<sup>a</sup></i>              |                                      |                 |
| Electrostatic                                                    | -1239.1 ± 28.0                       |                 |
| Van der Walls                                                    | -343.9 ± 4.2                         |                 |
| Total energy                                                     | -1007.6 ± 26.4                       |                 |
| Residual NOE energy                                              | 43.8 ± 5.5                           |                 |
